# Supplementary material
Source: PubMed Central journal article supplement (PMC2832925)

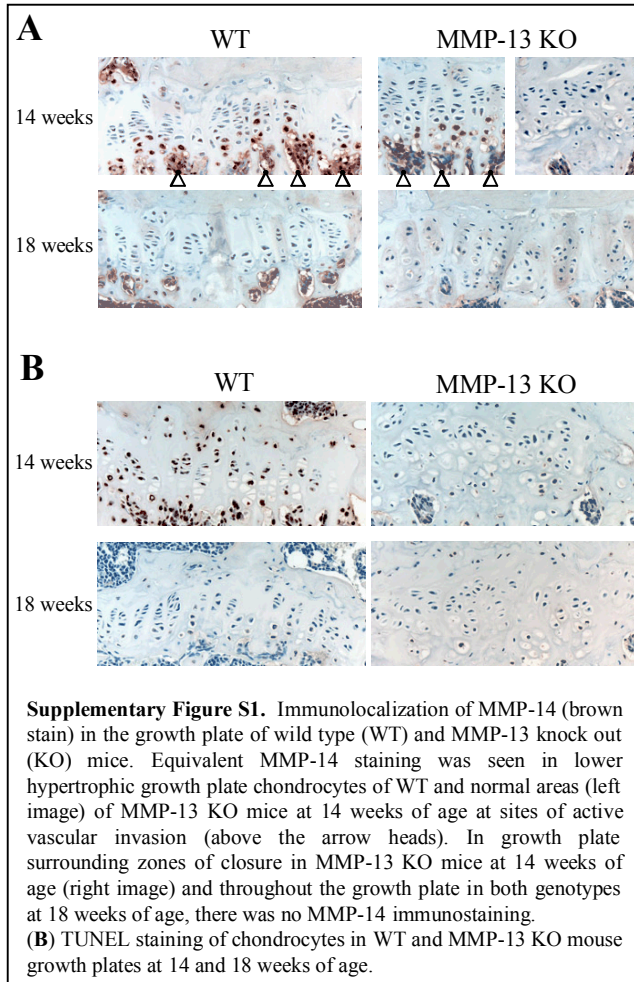

Supplement: NIHMS178473-supplement-supplement_1.pdf [file NIHMS178473-supplement-supplement_1.pdf]
